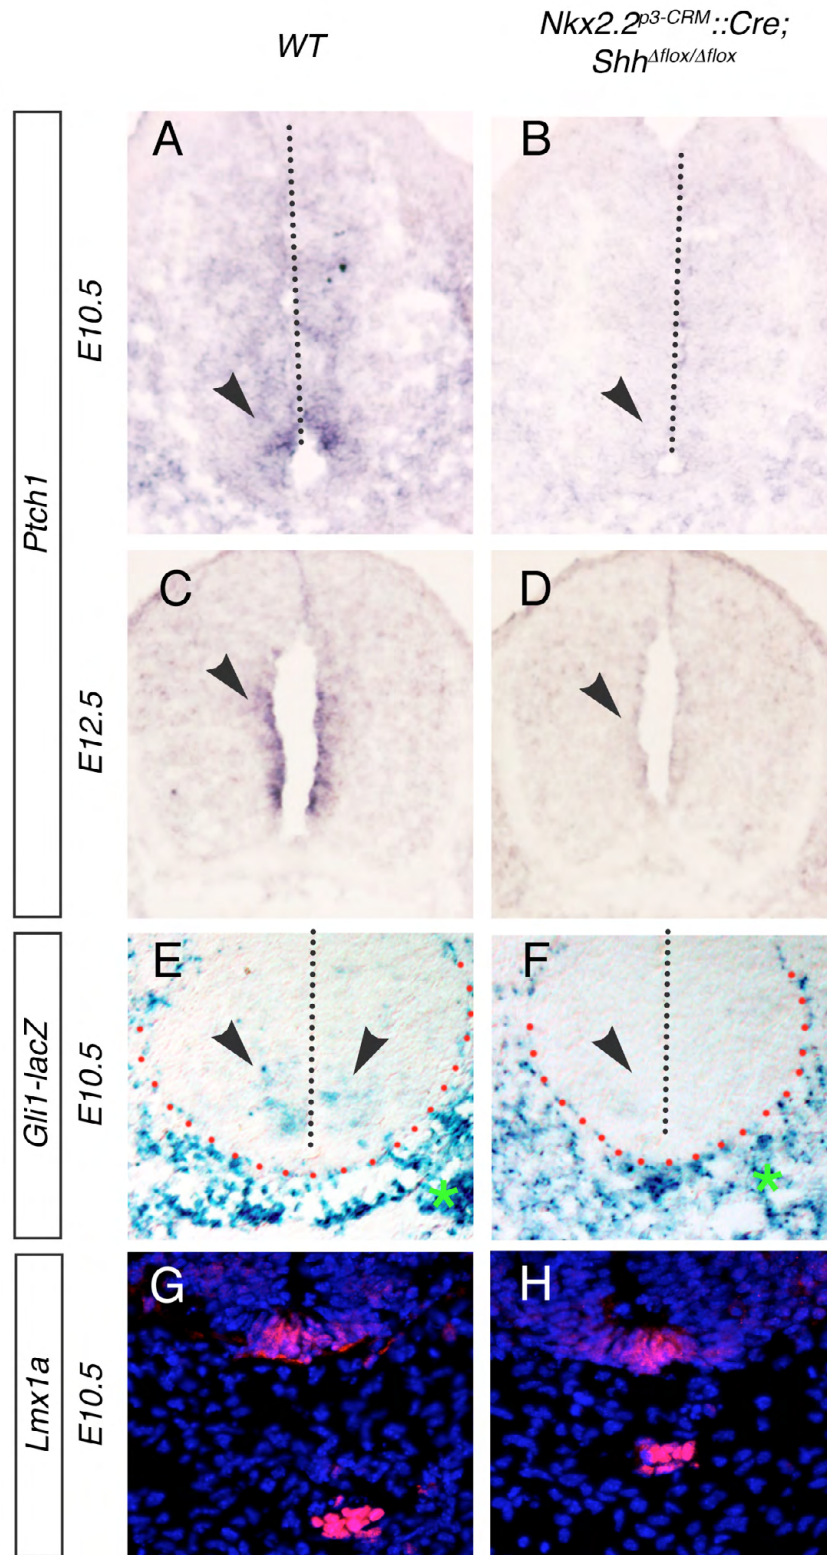

**Fig. S1. *Shh* target gene expression changes in the neural tube of *Shh<sup>AFP/AFP</sup>* embryos.** (A-D) *Ptch1* expression is reduced at both E10.5 and E12.5 (arrowheads). (E,F)  $\beta$ -gal expression in a targeted *Gli1<sup>lacZ</sup>* reporter line shows weaker expression in the ventral spinal cord in *Shh<sup>AFP/AFP</sup>* embryos (arrowheads) at E10.5. (G,H) *Lmx1a* expression is not altered in the FP at E10.5. Section in H is at a more rostral level than that in G in the thoracic region.

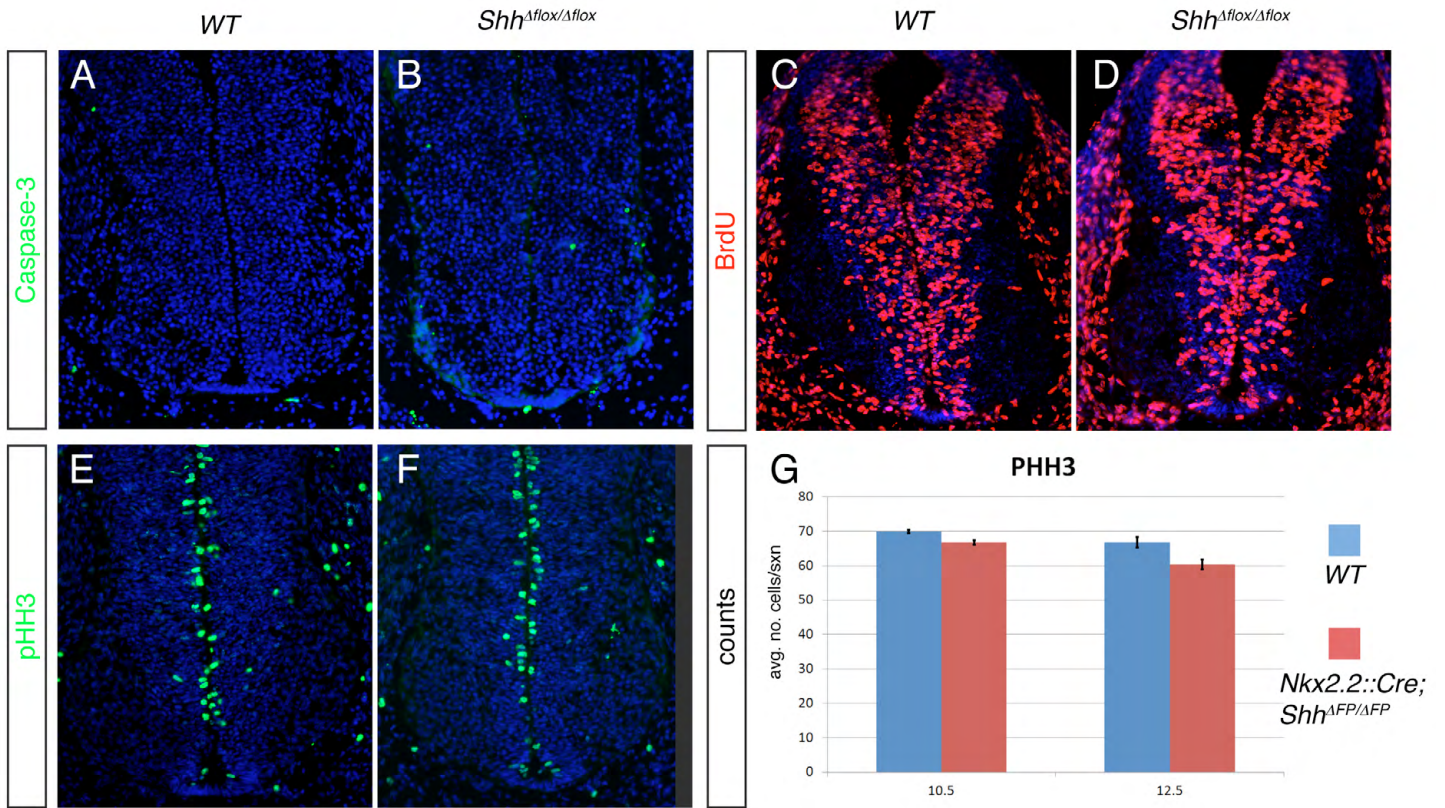

**Fig. S2. Analysis of cell proliferation and cell death in *Shh<sup>AFP/AFP</sup>* embryos.** (A,B) Activated caspase 3 expression is not elevated in conditional mutants compared with WT. (C-G) No significant differences were seen in BrdU incorporation rates or pHH3 expression in *Nkx2.2<sup>p3-CRM</sup>::Cre;Shh<sup>AFP/AFP</sup>* conditional mutants at E10.5 (A-F) and E12.5 (G) compared with WT.

E11.5

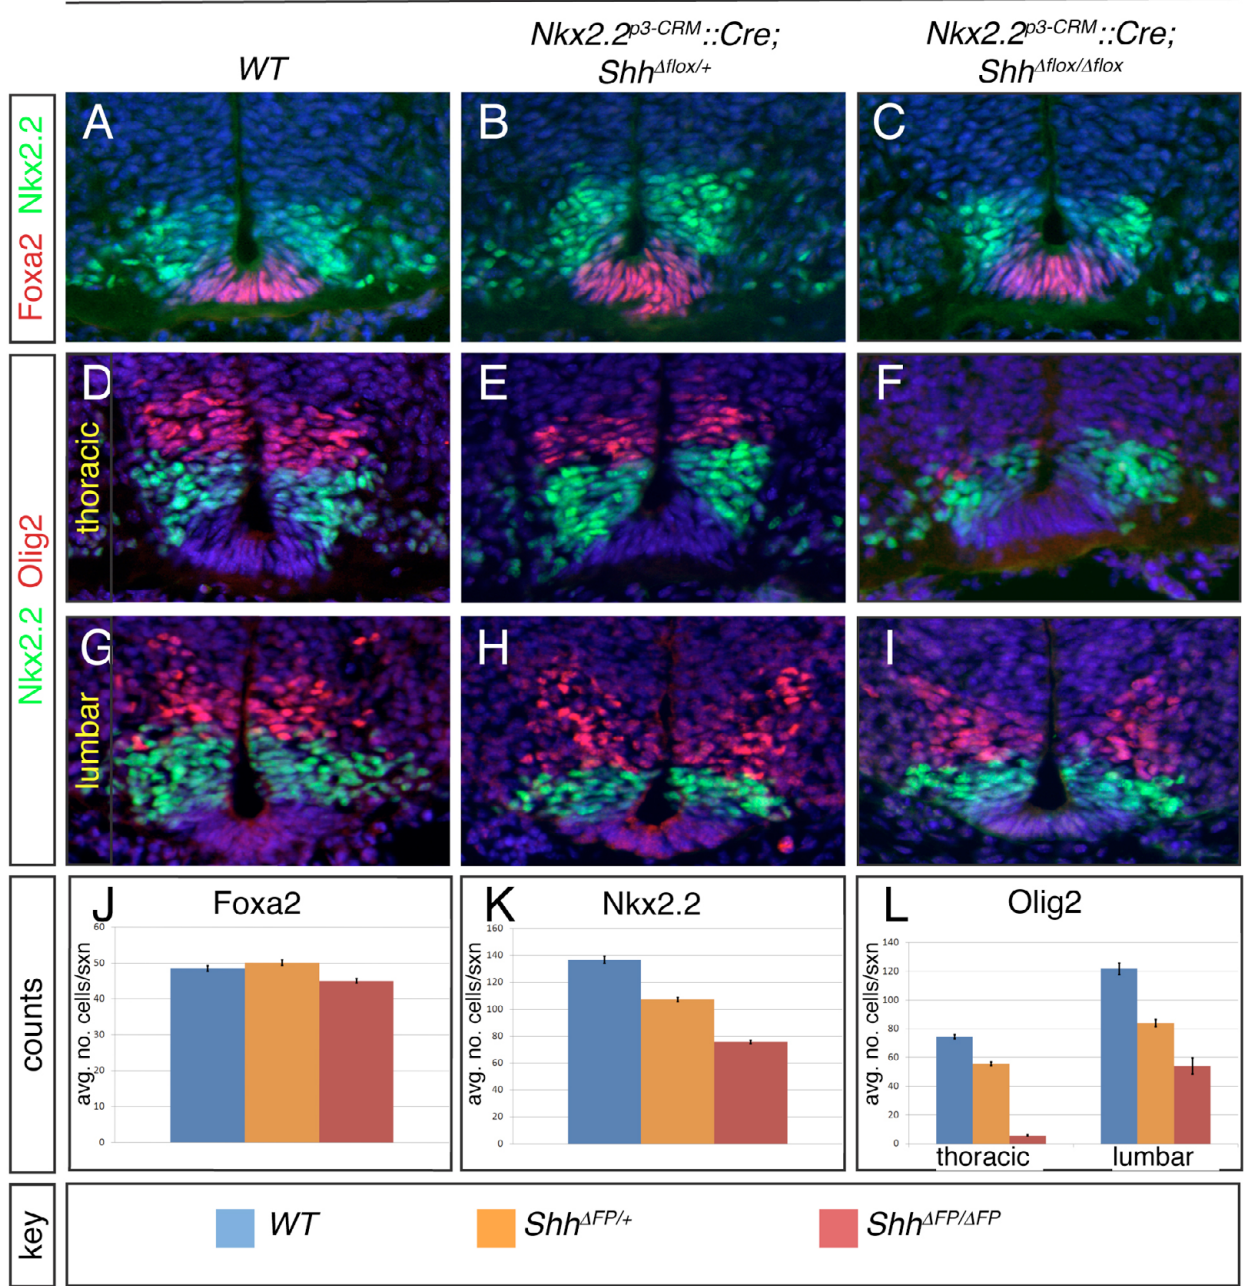

**Fig. S3. Altered progenitor domain marker protein expression in *Shh<sup>Δflox/Δflox</sup>* embryos at E11.5.** (A-C) Foxa2 and Nkx2.2 expression in WT (A), *Shh<sup>Δflox/+</sup>* heterozygotes (B) and *Shh<sup>Δflox/Δflox</sup>* homozygotes (C). (D-I) Nkx2.2 and Olig2 expression in thoracic (D-F) and lumbar (G-I) regions. (J-L) Quantification of marker expression.

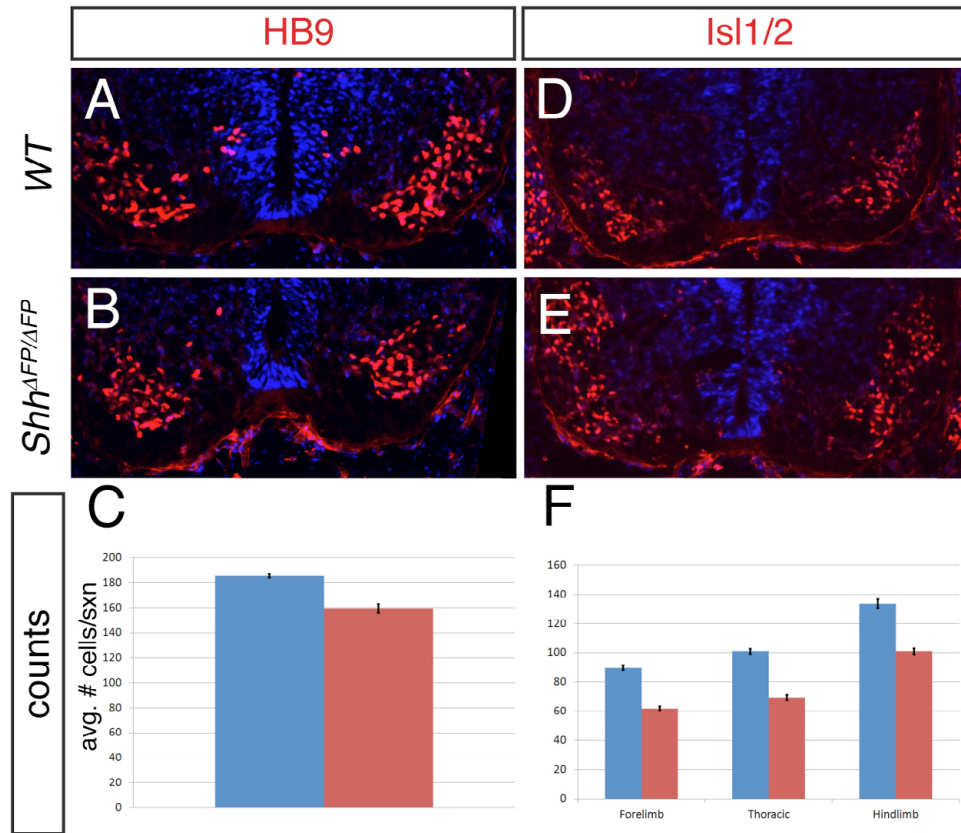

**Fig. S4. Reduction in motoneuron formation in *Shh<sup>AFP/AFP</sup>* embryos.** Staining for postmitotic motoneuron markers HB9 (A-C) and Isl1/2 (D-F) in E12.5 embryos shows that reduced numbers of cells are generated.

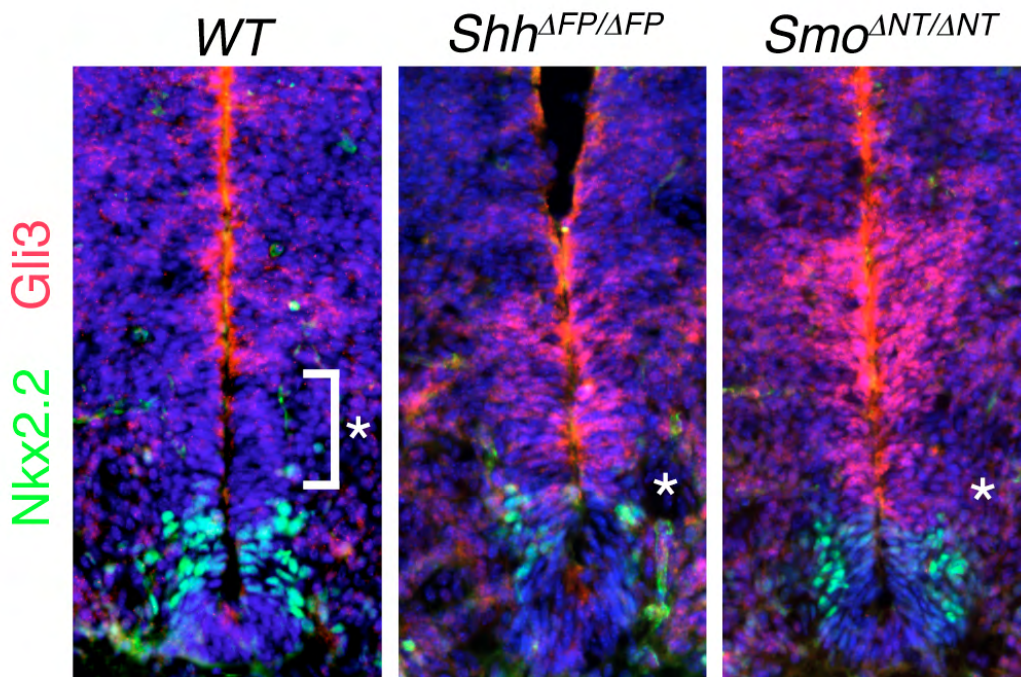

**Fig. S5. Gli3 expression shifts ventrally in *Shh<sup>AFP/AFP</sup>* and *Smo<sup>ANT/ANT</sup>* embryos.** E11.5 embryos stained for Gli3 and Nkx2.2 (marking the p3 domain) show a ventral shift in the expression boundary of Gli3 into the pMN domain (brackets, asterisks).

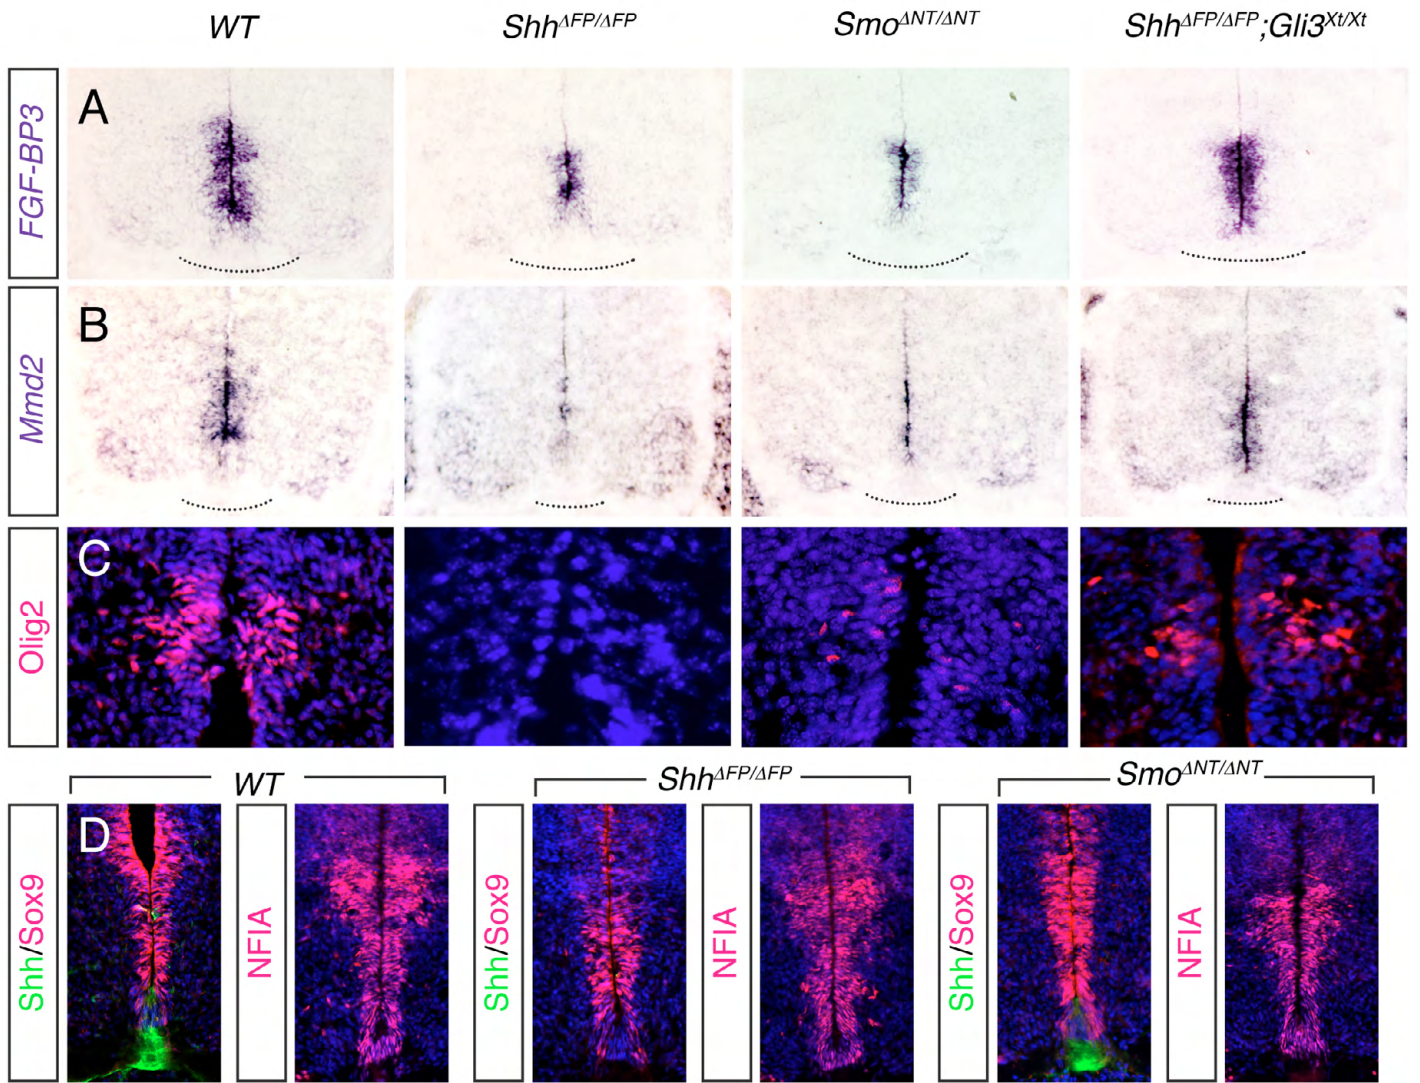

**Fig. S6. Changes in the expression of specific glial progenitor genes in mutant embryos identifies novel Shh-Gli target genes.** (A,B) Staining for Fgfbp3 and Mmd2 in WT, *Shh*<sup>AFP/ΔFP</sup>, *Smo*<sup>ANT/ANT</sup> and *Shh*<sup>AFP/ΔFP</sup>;*Gli3*<sup>Xt/Xt</sup> mutant embryos at E12.5. Expression of both genes is reduced or absent in *Shh*<sup>AFP/ΔFP</sup> and *Smo*<sup>ANT/ANT</sup> embryos but is restored in *Shh*<sup>AFP/ΔFP</sup>;*Gli3*<sup>Xt/Xt</sup> mutants. (C) Expression of Olig2, a gene that appears to be primarily regulated by Gli3 derepression, is shown for comparison. (D) Sox9 and Nfia expression in *Shh*<sup>AFP/ΔFP</sup> and *Smo*<sup>ANT/ANT</sup> embryos is not altered. Shh is shown in some panels for comparison.

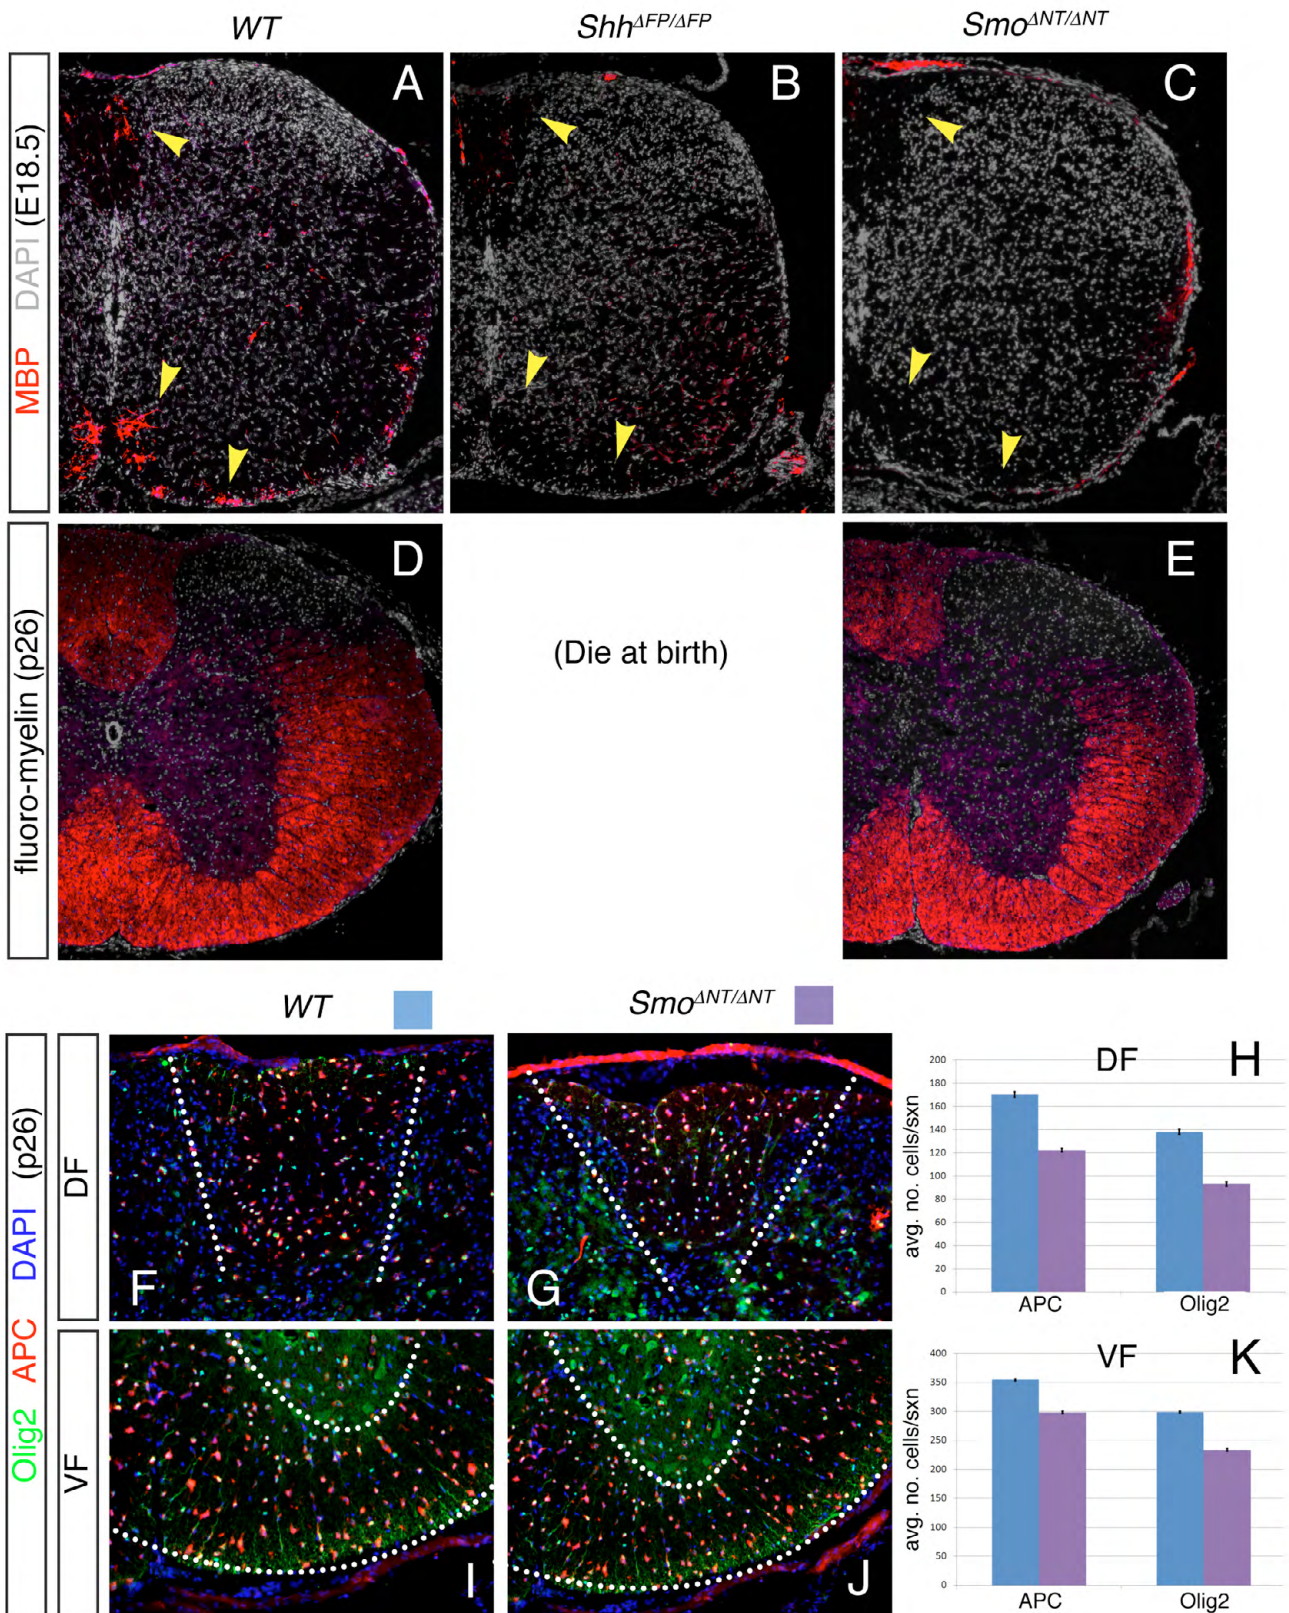

**Fig. S7. Expression of differentiated OL marker protein expression in *Shh<sup>AFP/AFP</sup>* and *Smo<sup>ANT/ANT</sup>* embryos at E18.5 and P26.** (A-C) Myelin basic protein (Mbp) expression in WT (A), *Shh<sup>AFP/AFP</sup>* (B) and *Smo<sup>ANT/ANT</sup>* (C) embryos shows reduced staining in both the VF and DF in mutant embryos (arrowheads). (D,E) Fluoromyelin expression is similar in WT (D) and *Smo<sup>ANT/ANT</sup>* (E) mice at P26. (F-K) Analysis of differentiated OL marker protein expression in P26 *Smo<sup>ANT/ANT</sup>* mice. Both Olig2 and Apc are reduced in both the DF and VF at this stage but to a lesser degree than at embryonic stages.

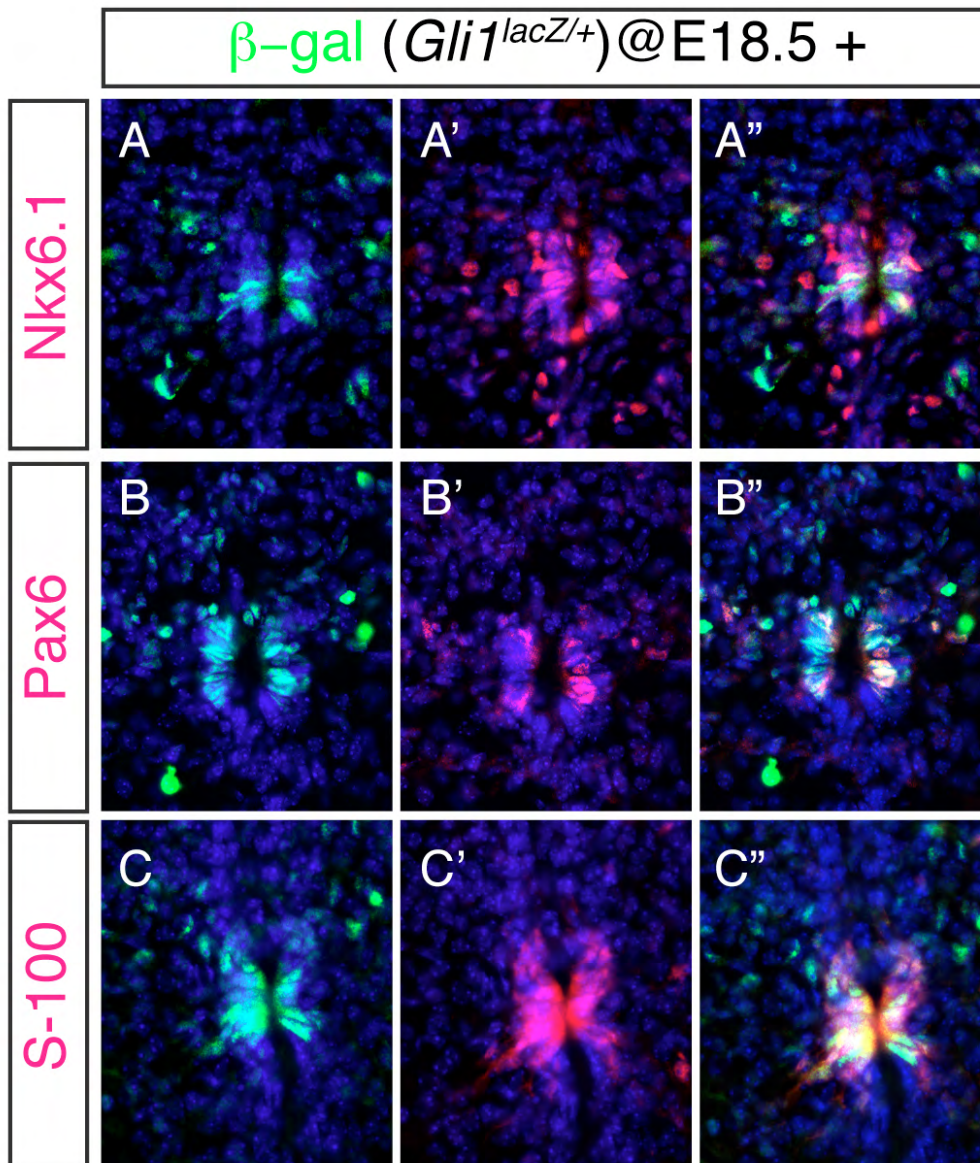

**Fig. S8. Co-expression of Nkx6.1, Pax6 and S-100 in *Gli1-lacZ*<sup>+</sup> VZ cells at E18.5.** (A-C'') All three markers show strong overlap with  $\beta$ -gal (from a *Gli1<sup>lacZ</sup>* knock-in line) in VZ cells (yellow). (A-C)  $\beta$ -gal; (A'-C') marker; (A''-C'') merge; all with DAPI.
